# Supplementary material for: Molecular Identification and Characterization of Two Groups of Phytoplasma and Candidatus Liberibacter Asiaticus in Single or Mixed Infection of Citrus maxima on Hainan Island of China
Source: MDPI journal article supplement (doi:10.3390/biology11060869), 2022-06-06
Supplement: s1 [file s1]

## Supplementary gene sequences

16S rRNA gene sequence fragments of the phytoplasma strains CmPII-hn and CmPXXXII-hn, 16S rRNA and  $\beta$ -operon gene sequence fragments of the *Candidatus* Liberibacter asiaticus strain CmLas-hn as well as their GenBank accession numbers are shown as follows:

>CmPII-hn, 16S rRNA gene, partial cds (ON159857)

```
AGCAACCTACCCTAAAGACGAGGATAACCATTGGAAACAGTGGCTAAGACTGGATAGGAAGAT
AAAAGGCATCTTGTATCTTTTAAAAGACCTAGTTAATAGGTATGCTTTAGGAGGGGCTTGCGCCA
TATTAGTTAGTTGGTAGGGTAATGGCCTACCAAGACGATGATGTGTAGCTGGACTGAGAGGTTG
AACAGCCACATTGGGACTGAGACACGGCCCAAACCTCCTACGGGAGGCAGCAGTAGGGAATTTTC
GGCAATGGAGGAAACTCTGACCGAGCAACGCCGCGTGAATGACGAAGTACTTCGGTATGTAAA
GTTCTTTTATCGAGGAAGAAAAGCAAATGGCGAACCATTTGTTTGCCGGTACTTGATGAATAAG
CCCCGGCTAATTATGTGCCAGCAGCCGCGGTAAGACATAAGGGGCAAGTGTTATCCGGAATTAT
TGGGCGTAAAGGGTGCGTAGGCGGTCTAGTAAGTCAGTGGTGTAAATGGCAACGCTTAACGTTGT
CCGGCTATTGAAACTGCTAAACTTGAGTTAGATAGAGGCGAGTGGAATTCCATGTGTAGCGGTA
AAATGCGTAAATATATGGAGGAACACCAGAGGCGTAGGCGGCTCGCTGGGTCTTAAGTACGCT
GAGGCACGAAAGCGTGGGGAGCAAACAGGATTAGATACCCTGGTAGTCCACGCCGTAAACGAT
GAGTACTAAGTGTCGGGTAAACCGGTACTGAAGTTAACACATTAAGTACTCCGCCTGAGTAGT
ACGTACGCAAGTATGAAACTTAAAGGAATTGACGGGACTCCGCACAAGCGGTGGATCATGTTGT
TTAATTCGAAGATACCCGAAAAACCTTACCAGGTCTTGACATGTTTTTGCAAAATGATAGTAATA
TCGTGGAGGTTACCAGAAACACAGGTGGTGCATGGTTGTCGTCAGCTCGTGTCTGTGAGATGTTA
GGTTAAGTCCTAAAACGAGCGAAACCCCTTATCGTTAGTTGCCAGCACGTTATGGTGGGGACTTTA
ACGAGACTGCCAATGATAAATTGGAGGAAGGTGAGGATCACGTCAAATCAGCATGCCCTTATG
ACCTGGGCTACAAACGTGATACAATGGCTGTTACAAAGGGTAGCTGAAACGCAAGTTCTTGGCC
AATCCCCAAAAACAGTCCCAGTCCGGATTGAAGTCTGCAACTCGACTTCATGAAGTTGGAATCG
CTAGTAATCGCGAATCAGCATGTGCGGGTGAATACGTTCTCGGGGTTTGTACACACCGCCCGTCA
AACCACGAAAGTTGGCAATACCCCAAAACGGTAGC
```

>CmPXXXII-hn, 16S rRNA gene, partial cds (ON159856)

```
CTGCCTTTAAGACGAGGATAACAAGTGGAAACATTTGCTAAGACTGGATAGGAAATAGAAGGAT
AACCTTTTATTTTTAAAAGACCTTCTTCGGAAGGTATGCTTAAAGAAGGGCTTGCGCCACATTAG
TTAGTTGGTAGGGTAAAAGCCTACCAAGACTATGATGTGTAGCTGGACTGAGAGGTTGAACAGC
CACATTGGGACTGAGACACGGCCCAAACCTCCTACGGGAGGCAGCAGTAGGGAATTTTCGGCAAT
GGAGGAAACTCTGACCGAGCAACGCCGCGTGAACGAAGAAGTATTTAGGTATGTAAAGTTCTTT
TATTGAAGAAGAAAAAATAGTGGAAGAACTATCTTGACGCTATTCAATGAATAAGCCCCGGCTA
ACTATGTGCCAGCAGCCGCGGTAAGACATAGGGGGCGAGCGTTATCCGGAATTATTGGGCGTAA
AGGGTGCGTAGGCGGTTAGATAAGTCTATAATTTAATTTTCAGTGCTTAACGCTGTTCTGTTATAG
AAACTGTCTAGCTAGAGTGAGATAGAGGCAAGTGGAATTCCATGTGTAGCGGTAAAATGTGTAA
ATATATGGAGGAACACCAGAAGCGTAGGCGGCTTGCTGGGTCTTTACTGACGCTGAGGCACGAA
```

AGCGTGGGTAGCAAACAGGATTAGATACCCTGGTAGTCCACGCCGTAAACGATGAGTACTAAGT  
GTCGGGGTTAAACTCGGTACTGAAGTTAACACATTAAGTACTCCGCCTGAGTAGTACGTACGCA  
AGTATGAACTTAAAGGAATTGACGGGACTCCGCACAAGCGGTGGATCATGTTGTTTAATTCGA  
AGATACACGAAAAACCTTACCAGGTCTTGACATACTCTGCAAAGCTATAGAAATATAGTGGAGG  
TTATCAGGGATACAGGTGGTGCATGGTTGTCGTCAGCTCGTGTCTGAGATGTTAGGTAAAGTCC  
TAAACGAGCGCAACCCTTGTCTTAATTGCCAGCACGTTATGGTGGGGACTTTAGCGGAGACTG  
CCAATTAATAAATTGGAGGAAGGTGAGGATTACGTCAAATCATCATGCCCTTATGATCTGGGCT  
ACAAACGTGATACAATGGCTGTTACAAAGAGTAGCTGAAATGCGAGTTTTTAGCCAATCTCAAA  
AAAGCAGTCTCAGTTCGGATTGAAGTCTGCAACTCGACTTCATGAAGTTGGAATCGCTAGTAATC  
GCGAATCAGCATGTCTCGCGGTGAATACGTTCTCGGGGTTTGTACACACCGCCCGTCAAACCACGA  
AAGTTGATAATAC

>CmLas-hn, 16S rRNA gene, partial cds (ON080846)

AACGTGTGCTAATACCGTATACGCCCTATTGGGGGAAAGATTTTATTGGAGAGAGATGAGCCTG  
CGTTGGATTAGCTAGTTGGTAGGGTAAGAGCCTACCAAGGCTACGATCTATAGCTGGTCTGAGA  
GGACGATCAGCCACACTGGGACTGAGACACGGCCAGACTCCTACGGGAGGCAGCAGTGGGGA  
ATATTGGACAATGGGGGCAACCCTGATCCAGCCATGCCGCGTGAGTGAAGAAGGCCTTAGGGTT  
GTAAAGCTCTTTGCGCGGAGAAGATAATGACGGTATTCGGAGAAGAAGCCCCGGCTAACTTCGT  
GCCAGCAGCCGCGTAATACGAAGGGGGCGAGCGTTGTTGGAATAACTGGGCGTAAAGGGCG  
CGTAGGCGGGCGATTAAGTTAGAGGTGAAATCCCAGGGCTCAACCTTGGAAGTGCCTTTAATAC  
TGGTTGTCTAGAGTTTAGGAGAGGTGAGTGAATTCCGAGTGTAGAGGTGAAATTCGTAGATAT  
TCGGAGGAACACCGGTGGCGAAGGCGGCTCACTGGCCTGATACTGACGCTGAGGCGCGAAAGC  
GTGGGGAGCAAACAGGATTAGATACCCTGGTAGTCCACGCCGTAAACGATGAGTGCTAGCTGTT  
GGGTGGTTTACCATTCAAGTGGCGCAGCTAACGCATTAAGCACTCCGCCTGGGGAGTACGGTCGC  
AAGATTAATAACTCAAAGGAATTGACGGGGGCCGACAAGCGGTGGAGCATGTGGTTTAATTCG  
ATGCAACGCGCAGAACCTTACCAGCCCTTGACATGTATAGGACGATATCAGAGATGGTATTTTC  
TTTTCGGAGACCTTTACACAGGTGCTGCATGGCTGTCGTCAGCTCGTGTCTGAGATGTTGGGTT  
AAGTCCCGCAACGAGCGCAACCCCTGCCTCTAGTTGCCATCAAGTTTAGGTTTTTACCTAGATGT  
TGGGTACTTTATAGGGACTGCCGGTGATAAGCCGGAGGAAGGTGGGGATGA

>CmLas-hn,  $\beta$ -operon gene fragment, partial cds (ON098932)

GGATTCCTTTTTCGCTATCGGATCGCTTCTTTTTTGTAAAGGGATGCGTTAGGATTTTTGTTCTTCTT  
CGAAATCAAGATATGAAAATATTTTCTTGGTATAGATATAGGAAAAGGAATGGGTATATTTGTC  
ATCTGGAGATGAAAGTTGAATAGACAAGGAAAGAGCGTAGAAATTTCTGAATTAAGTAAGATTT  
TTTCTTCTTCTGGATCAATTGTTGTTGCACATTATAAGGGAATTAGTGTGCGCAAATTAAGAT  
CTTCGGAAAAAGATGCGGGAAGCTGGTGGAGGTGTAAAGTTGCCAAAAATCGTCTCGTCAAGA  
TTGCTATCCGTGATACTAGTATTAGAGGAATATCTGATCTTTTCGTTGGGCAGTCTCTAATTGTCT  
ATTCGGATAGTCCTGTTATTGCTCCTAAAATTCGGTTAGCTTTTCAAATGACAATAATGAATTTA  
GAGTTCTTGGTGGGGTTGTAGAGAAGGGCGTCCTTAATCAAGATTCTATCAAGCAAATTGCTTCT  
TTACCCGATCTTGAGGGTATTCGAGCTGGTATCATAAGTGCTATCCAATCTAATGCAACT
